## 1 **Genome-wide association mapping of correlated traits in cassava: dry matter and total** 2 **carotenoid content**

3  
4 Ismail Y. Rabbi<sup>1\*</sup>, Lovina I. Udoh<sup>1</sup>, Marnin Wolfe<sup>2</sup>, Elizabeth Y. Parkes<sup>1</sup>, Melaku A. Gedil<sup>1</sup>,  
5 Alfred Dixon<sup>1</sup>, Punna Ramu<sup>3</sup>, Jean-Luc Jannink<sup>2,4</sup>, Peter Kulakow<sup>1</sup>.

- 6  
7 1. International Institute of Tropical Agriculture (IITA), PMB 5320 Ibadan, Oyo, Nigeria  
8 2. Department of Plant Breeding and Genetics, Cornell University, Ithaca, NY, USA  
9 3. Institute of Genomic Diversity, Cornell University, Ithaca, NY, USA.  
10 4. USDA-ARS, R.W. Holley Center for Agriculture and Health, Ithaca, NY, USA

11 \* Corresponding author, email: [I.Rabbi@cgiar.org](mailto:I.Rabbi@cgiar.org)

### 12 **ABSTRACT**

13  
14  
15 **Cassava (*Manihot esculenta* (L.) Crantz) is a starchy root crop cultivated in the tropics for**  
16 **fresh consumption and commercial processing. Dry matter content and micronutrient**  
17 **density, particularly of provitamin A – traits that are negatively correlated – are among**  
18 **the primary selection objectives in cassava breeding. This study aimed at identifying**  
19 **genetic markers associated with these traits and uncovering the potential underlying**  
20 **cause of their negative correlation – whether linkage and/or pleiotropy. A genome-wide**  
21 **association mapping using 672 clones genotyped at 72,279 SNP loci was carried out. Root**  
22 **yellowness was used indirectly to assess variation in carotenoid content. Two major loci**  
23 **for root yellowness was identified on chromosome 1 at positions 24.1 and 30.5 Mbp. A**  
24 **single locus for dry matter content that co-located with the 24.1 Mbp peak for carotenoid**  
25 **content was identified. Haplotypes at these loci explained a large proportion of the**  
26 **phenotypic variability. Evidence of mega-base-scale linkage disequilibrium around the**  
27 **major loci of the two traits and detection of the major dry matter locus in independent**  
28 **analysis for the white- and yellow-root subpopulations suggests that physical linkage**  
29 **rather than pleiotropy is more likely to be the cause of the negative correlation between**  
30 **the target traits. Moreover, candidate genes for carotenoid (*phytoene synthase*) and**  
31 **starch biosynthesis (*UDP-glucose pyrophosphorylase* and *sucrose synthase*) occurred in**  
32 **the vicinity of the identified locus at 24.1 Mbp. These findings elucidate on the genetic**  
33 **architecture of carotenoids and dry matter in cassava and provides an opportunity to**  
34 **accelerate genetic improvement of these traits.**

### 35 **CORE IDEAS**

- 36  
37 • Cassava, a starchy root crop, is a major source of dietary calories in the tropics.  
38 • Most varieties consumed are poor in micronutrients, including pro-vitamin A.  
39 • These two traits are governed by few major loci on chromosome one.  
40 • Genetic linkage, rather than pleiotropy, is the most likely cause of their negative  
41 correlation.

### 42 **INTRODUCTION**

43  
44  
45 Cassava (*Manihot esculenta* (L.) Crantz) is one of the most important food and feed crops in  
46 the tropics and Africa accounts for more than half of the total world-wide production of

47 270.3 million tonnes (<http://faostat3.fao.org/>, accessed 26.03.2016). Because of its  
48 remarkable tolerance to drought (El-Sharkawy, 1993), its ability to grow in poor soils (Cock,  
49 1982), and its perennial nature which allows it to be harvested as and when required, this  
50 heterozygous and clonally propagated species plays a particularly important role in food  
51 security for millions of small-holder farmers in developing countries. Moreover, cassava is  
52 increasingly being cultivated for commercial processing to convert its storage roots into  
53 dehydrated chips, flour and starch (Balagopalan, 2002). Dry matter content, of which a large  
54 proportion is starch, is therefore a primary factor that defines adoption of new cassava  
55 varieties by farmers and the market value of harvested roots (Okechukwu and Dixon, 2008).  
56 As a result, breeding of improved varieties with high dry matter content is one of the  
57 primary objectives of cassava genetic improvement programs in the world.

58  
59 Another important target trait for cassava improvement in developing countries is  
60 biofortification for micronutrients (Pfeiffer and McClafferty, 2007; Saltzman et al., 2013).  
61 Most varieties grown and consumed throughout the world have white storage roots with  
62 negligible amounts of micronutrients in general, and provitamin A in particular (Welsch et  
63 al., 2010). Dietary diversification and breeding of farmer-preferred improved varieties with  
64 higher nutritional density are complementary approaches used in addressing potential  
65 micronutrient deficiency associated with consumption of cassava as the sole staple food  
66 (Sayre et al., 2011). The crop's gene-pool exhibits considerable natural variation for storage  
67 root carotenoids that can be tapped for breeding of biofortified varieties, with some  
68 breeding populations reported to accumulate as much as 25.8 µg/g fresh root weight  
69 (Ceballos et al., 2013; Sánchez et al., 2014).

70  
71 Despite availability of natural genetic diversity in the global germplasm that is relevant to  
72 breeding for increased dry matter and total carotenoid contents, improving these traits  
73 through phenotype-based recurrent selections is a lengthy process, due to the breeding  
74 complexities associated with the species including an annual cropping cycle of 12 to 24  
75 months and low multiplication rate of planting materials. Understanding the genetic basis of  
76 variation in these traits is essential for increasing their selection efficiency and the rate of  
77 genetic gain. More importantly, several studies using diverse germplasm have reported that  
78 dry matter and carotenoid content are negatively correlated, with  $r$  values ranging from -0.1  
79 to -0.5 (Marín Colorado et al., 2009; Akinwale et al., 2010; Esuma et al., 2012; Ceballos et al.,  
80 2013; Njoku et al., 2015). Despite its significant implication in breeding, the genetic basis of  
81 this correlation – whether it is due to genetic linkage or pleiotropy – is not understood.

82  
83 Several mapping studies using either Bulk Segregant Analysis (BSA) or Quantitative Trait Loci  
84 (QTL) mapping of S1 or F1 populations have been reported separately for dry matter and  
85 carotenoid content (Balyejusa Kizito et al., 2007; Marín Colorado et al., 2009; Welsch et al.,  
86 2010; Morillo C et al., 2013; Njoku et al., 2014). The mapping resolution from single-cross  
87 experimental populations is expected to be limited due to the use of sparse genetic maps  
88 and the limited number of recombination events observed (Hamblin et al., 2011). Moreover,  
89 QTLs from such bi-parental populations may not provide insight into the tremendous  
90 genetic and phenotypic variation of the larger gene pool (Zhao et al., 2011). The increased  
91 availability of genomic resources for cassava, including the chromosome-scale reference  
92 genome and integrated linkage map (Prochnik et al., 2012; International Cassava Genetic  
93 Map Consortium (ICGMC), 2014) and high-density genotyping using next-generation

94 sequencing (Rabbi et al., 2014a; b) makes it possible to use genome-wide association  
95 (GWAS) mapping to dissect the phenotypic diversity of cassava germplasm with respect to  
96 dry matter and carotenoid content. GWAS, which takes advantage of natural linkage  
97 disequilibrium (LD) generated by ancestral mutation, drift, and recombination events in  
98 diverse germplasm, offers the possibility to overcome the shortcomings of traditional bi-  
99 parental QTL mapping. These advantages mean GWAS is able to reveal a broader spectrum  
100 of trait-linked allelic variation and thus may provide the most useful markers for marker-  
101 assisted selection (MAS). Indeed, GWAS has already been applied in other crops such as  
102 maize to study the genetic architecture of carotenoid accumulation (Harjes et al., 2008;  
103 Owens et al., 2014; Suwarno et al., 2015). In cassava, Esuma et al., (2016) carried out a  
104 GWAS study using a panel of partial inbreds (S1 and S2 generation) produced from eight  
105 clones. Using this limited number of parents, they reported a single genomic region on  
106 Chromosome 1 that underlies the variation in total carotenoid content. However, no joint  
107 association analysis examining carotenoids and dry matter content has hitherto been  
108 reported. Here, we present the results of a GWAS using a collection of more than 650  
109 cassava clones representing diverse African germplasm genotyped at high-density using  
110 genotyping-by-sequencing (Elshire et al., 2011). The population was phenotyped in two  
111 locations for three consecutive field seasons. The results of this study will be used to  
112 develop efficient strategies to breed for high dry matter and provitamin A content varieties.

113

## 114 METHODS

115

116 **Germplasm:** The present work was carried out using the Tropical Manihot Selection (TMS)  
117 cultivars developed at the International Institute of Tropical Agriculture (IITA) in Nigeria. This  
118 population, also known as the Genetic Gain collection, consist of more than 650 advanced  
119 breeding lines and key landraces selected over four decades from 1970 (Okechukwu and  
120 Dixon, 2008; Ly et al., 2013). The pedigree of the collection is mainly composed of crosses  
121 between germplasm from West Africa and early introductions of CMD-tolerant lines arising  
122 from interspecific hybridization between *Manihot glaziovii* and cultivated cassava at the  
123 Amani station in Tanzania (Hahn et al., 1980). The collection also includes hybrid germplasm  
124 from Latin America (Wolfe et al., 2016).

125

126 **Locations and experimental design:** The Genetic Gain population was planted using an  
127 incomplete block design with two checks per block and single row of either 5 or 10 plants  
128 spaced at 1m<sup>2</sup>. Data used for this study was collected in the 2012-2013, 2013-2014, and  
129 2014-2015 field seasons in Ibadan (7.40° N, 3.90° E) and Ubiaja (6.66° N, 6.38° E). The trials  
130 are usually planted in June, at the onset of the raining season in South West Nigeria and  
131 harvested in June of the following year.

132

133 **Assessment of dry matter content and yellow color intensity of storage roots:** Dry matter  
134 content was assessed using the oven-drying method. Eight fully developed roots were  
135 randomly selected from each plot, peeled, chipped and thoroughly mixed. For each sample,  
136 100g was weighed and oven-dried for 48 hours at 104°C till constant weight was achieved.  
137 The samples were then re-weighed and the dry matter content was expressed as the  
138 percentage of dry weight relative to fresh weight.

139

140 Because of the well-established linear relationship between intensity of yellow color and

141 carotenoid content in cassava storage roots (Pearson's coefficient,  $r$ , ranges from 0.81 to  
142 0.89), we used root yellowness as an indirect measure of carotenoid content (Iglesias et al.,  
143 1997; Chávez et al., 2005; Marín Colorado et al., 2009; Akinwale et al., 2010; Sánchez et al.,  
144 2014). The relative difference among clones in the Genetic Gain population was assessed  
145 using two complementary methods. The first was a visual gradation of yellow color using a  
146 standard color-chart starting from one (white) to 7 (deep yellow). Due to the potential  
147 subjectivity inherent in visual color scores, we complemented the color-chart method  
148 through the use of a Minolta CR-410<sup>®</sup> chromameter. Approximately 100g of grated samples  
149 from freshly peeled roots were placed in transparent Nasco Whirl-Pak<sup>®</sup> sampling bags and  
150 four chromameter measurements taken in different sections of the bag. We chose the  
151 commission internationale de l'éclairage (CIELAB) method that records color values in a  
152 three-dimensional color space, where the  $L^*$  coordinate corresponds to a lightness  
153 coordinate, and the  $a^*$  coordinate corresponds either to red (positive values) or to green  
154 (negative values). Of importance to this study was the  $b^*$  coordinate, whose positive values  
155 represents yellow while the negative values represent blue. The illuminant used was D65  
156 and calibration was done each day with a white ceramic.

157  
158 **SNP genotyping:** DNA was extracted as described in Rabbi et al. (2014) and Genotyping-by-  
159 sequencing was carried out as described by (Elshire et al., 2011). DNAs from the Genetic  
160 Gain individuals were digested individually with *ApeKI*, a methylation sensitive restriction  
161 enzyme that recognizes a five base-pair sequence (GCWGC, where W is either A or T). The  
162 GBS sequencing libraries consisting of 95-plex DNA samples each were prepared by ligating  
163 the digested DNA to unique sample identifier barcodes (nucleotide adapters) followed by  
164 standard PCR. Sequencing was performed using Illumina HiSeq2500. The sequenced reads  
165 from different genotypes were de-convoluted using their unique barcodes and aligned to  
166 version 6.0 of the cassava reference genome ([www.phytozome.org/cassava](http://www.phytozome.org/cassava)) with the  
167 Bowtie 2 (Langmead and Salzberg, 2012). SNPs were discovered using the GBS pipeline  
168 Version 2 implemented in TASSEL software (Glaubitz et al., 2014) and converted to dosage  
169 format (0 = homozygous reference, 1 = heterozygous, 2 = homozygous non-reference  
170 alleles). Missing data were filtered as described in (Wolfe et al., 2016) and imputed with the  
171 glmnet algorithm in R (<http://cran.r-project.org/web/packages/glmnet/index.html>) (Wong  
172 et al., 2014).

173  
174 **Phenotypic data analysis:**

175 The phenotypic data across two locations and three years was collapsed to single best linear  
176 unbiased predictor (BLUP) values for each clone by fitting the following mixed linear model  
177 with the *lme4* package in R:

$$178 y_{lij} = \mu + c_l + \beta_i + c_l * \beta_i + \varepsilon_{lij}$$

179 Here,  $y_{lij}$  represents raw phenotypic observations,  $\mu$  is the grand mean,  $c_l$  is a random  
180 effects term for clone with  $c_l \sim N(0, \sigma_c^2)$ ,  $\beta_i$  is a fixed effect for the combination of location  
181 and year harvested,  $c_l * \beta_i$  is a random effect for genotype-by-environment variance, and  
182  $\varepsilon_{lij}$  is the residual variance, assumed to be random and distributed  $N(0, \sigma_e^2)$ . Broad-sense  
183 heritability for dry matter content and yellow color intensity was calculated according to (Ly  
184 et al., 2013). Genetic correlation among traits was also calculated from BLUP values.

185  
186 **Population structure and Genome-Wide Association Analyses:** Inherent population  
187 structure and cryptic relatedness can lead to spurious associations in GWAS (Astle and



188 Balding, 2009). To control for these confounding factors, three standard GWAS models were  
189 compared: a simple one-way ANOVA model with no correction (naïve model); a general  
190 linear model (GLM) with the first five PCs of the SNP matrix as covariates (GLM + 5PCs); and  
191 a mixed-linear model (MLM) using the five PCs and marker-estimated kinship matrix (Yu et  
192 al., 2006). The models correcting for kinship and 5 PCs had the lowest inflation-factors as  
193 determined from quartile-quartile (QQ) plots and therefore the lowest false-discovery rate  
194 (**Supplementary Figure 1**). The association analyses were implemented in TASSEL (Bradbury  
195 et al., 2007; Zhang et al., 2010). Association test P-values were considered significant when  
196 more extreme than the Bonferroni threshold (with experiment-wise type I error rate of  
197 0.05).

198  
199 The patterns and extent of linkage disequilibrium (LD) in a population not only determines  
200 the obtainable resolution in association mapping studies (Hamblin et al., 2011) but also has  
201 strong implication in the interpretation of association peaks. Therefore the level of LD decay  
202 and the local patterns of LD along each chromosome were determined by calculating intra-  
203 chromosomal pairwise squared correlation ( $r^2$ ) using PLINK (Purcell et al., 2007).

204

## 205 RESULTS

206 **SNP genotyping:** A total of 72,279 genome-wide SNP markers were called for the 672  
207 genetic gain individuals after filtering for minor allele frequency threshold of 0.005. The  
208 high-density coverage of SNPs resulted in an average of 4015 markers per chromosome,  
209 ranging from 3101 on chromosome 16 to 5880 on chromosome 1.

210

211 **Phenotypic variability:** We investigated the phenotypic variation in dry matter content as  
212 well as carotenoid-based intensity of yellow root color using a visual color chart and  
213 chromameter. The dry matter content varied widely in the Genetic Gain population ranging  
214 from 8.4% to 45% (average 28.6%, Table 1). About two-thirds of the evaluated clones have  
215 white storage roots while the remaining showed a range of yellow color suggesting varying  
216 levels of carotenoid content. On average, the visual score was 1.7 and ranged from 1 (white)  
217 to 7 (yellow). The average chromameter measure of yellow color intensity ( $b^*$  value) was  
218 20.8 and ranged from 11.1 (white) to 40.8 (yellow). Dry matter was approximately normally  
219 distributed while chromameter  $b^*$  values showed a bimodal distribution (**Figure**  
220 **1**) in which the first peak ( $b^*$  values from 10 to 20) is associated with the white clones while  
221 the second peak ( $b^*$  values from 20 to 40) is associated with the variations among the  
222 yellow clones.

223 Broad-sense heritability was high for root yellow color ( $H^2 = 0.87$  and  $0.82$  for color chart  
224 and chromameter  $b^*$  values, respectively) but moderate for dry matter content ( $H^2 = 0.51$ ).  
225 These values are within the range of heritabilities reported previously for these traits  
226 (Balyejusa Kizito et al., 2007; Ceballos et al., 2013). The relative importance of genotype-by-  
227 environment variance ( $V_{G \times E}$ ) compared to genotype ( $V_G$ ) variance was measured by the ratio  
228  $V_{G \times E}/V_G$ . For all traits, the genetic variance component was larger than the genotype-by-  
229 environment interaction variance. The interaction is minimal for the yellow color  
230 measurements (0.054 and 0.173 for color chart and chromameter  $b^*$  values, respectively).  
231 For dry matter content, we observed a slightly higher interaction ratio of 0.214.

232

233 The BLUPs for dry matter content and gradation of yellow color were negatively correlated  
234 in our germplasm collection (Pearson's correlation coefficient,  $r = -0.59$ ; P-value < 0.0001),

235 indicating that clones with higher carotenoid content are more likely to have low dry matter  
236 content (**Figure 2**) which confirms previous findings in cassava (Marín Colorado et al., 2009;  
237 Akinwale et al., 2010; Esuma et al., 2012; Njoku et al., 2015). On the other hand, we found a  
238 positive association between dry matter content and color lightness (chromameter L\* value,  
239  $r = 0.60$ , P-value < 0.0001). The two measures of yellow color (i.e. color chart and  
240 chromameter b\* axis) were strongly correlated ( $r = 0.96$ , P-value < 0.0001).

241

242 **Population structure:** Analysis of population structure in 672 accessions genotyped across  
243 72,279 SNPs using PCA detected subtle genetic differentiation in the genetic gain collection,  
244 with the first 10 PCs explaining about 23 % of the genetic variation. The first two principal  
245 components, which accounted for 8% of the genetic variation, revealed genetic  
246 differentiation between white and yellow-root clones (**Figure 3**).

247

248 **Linkage disequilibrium:** Several regions of extensive mega-base-scale LD were discovered in  
249 chromosomes 1, 4 and 10 as well as smaller regions in other chromosomes (**Figure 4**).

250 Excluding results from chromosomes with large LD blocks (i.e. chromosomes 1, 4 and 10),  
251 we found that on average, LD drops almost to background levels ( $r^2 < 0.1$ ) at around 2 Mb in  
252 the Genetic Gain population (**Figure 5**).

253

254 **Population-wide GWAS:**

255 **Variation in carotenoid content estimated by root yellowness:** The MLM-based GWAS  
256 analysis for yellow color in the storage root parenchyma using both the color chart and the  
257 chromameter-based methods uncovered the same major association regions occurring at  
258 24.1 and 30.5 Mbp of chromosome 1 (**Figure 6**). This is not surprising given the high  
259 correlation between the two color assessment methods. The first major peak is tagged by  
260 marker S1\_24121306 for visual gradation of color ( $-\log_{10}(\text{p-value})$  of 21.8) and marker  
261 S1\_24159585 ( $-\log_{10}(\text{p-value})$  of 18.8) for chromameter b\* value (Table 2). The second peak  
262 was tagged by the same marker, S1\_30543382, for both measures of color intensity and  
263 occurred 6.5 Mbp away from the first peak ( $-\log_{10}(\text{p-value})$  of 10.54 and 10.78, for color  
264 chart and chromameter, respectively). All other SNPs between the two major regions were  
265 not significant at the Bonferroni significance threshold ( $P = 6.92\text{e-}07$ ) (**Figure 7**). The LD  
266 between SNPs S1\_24121306 and S1\_30543382 was 0.3, suggesting moderate non-random  
267 segregation of alleles of the two markers in these regions.

268

269 **Dry matter content:** Genetic variation in dry matter content was found to be associated  
270 with a major locus occurring at 24.1 Mbp region of chromosome 1 and tagged by marker  
271 S1\_24121306 ( $-\log_{10}(\text{p-value})$  of 11.73). Importantly, this locus for dry matter content co-  
272 locates with one of the two peaks found to be associated with carotenoid content (**Figure**  
273 **7**). The genomic co-location of the major loci for dry matter content and root yellowness  
274 suggests either a strong physical linkage between the genes underlying these important  
275 traits or a pleiotropic effect. Distinguishing between these two possible causes is important  
276 in cassava improvement efforts that target both traits. We therefore attempted to unravel  
277 the genetic cause of the observed association by: (i) exploring the underlying linkage  
278 disequilibrium patterns in the QTL regions on chromosome 1; (ii) carrying out independent  
279 association analysis for dry matter content within the white root and yellow root  
280 subpopulations; and (iii) searching for plausible biological explanation by identifying  
281 candidate genes for both traits in the target region.

282

283 Exploration of the LD landscape along Chromosome 1 uncovered a mega-base-scale region  
284 of low recombination extending from 22Mb to 33 Mb surrounding the association peaks for  
285 dry matter content and yellow color (**Figure 7**). This region was recently shown to coincide  
286 with a large *Manihot glaziovii* introgression segment (Bredeson et al., 2016) that traces back  
287 to early breeding for resistance to cassava mosaic and cassava brown streak viruses in the  
288 1930's (Hahn et al., 1980). Clustering of the Genetic Gain population based on identity-by-  
289 descent relationship (i.e. a measure of how many alleles at any marker in each of the two  
290 samples came from the same ancestral chromosomes) calculated using only markers from  
291 this extensive LD region (2150 SNPs from markers S1\_21567540 to S1\_34950326) revealed  
292 at least two major groups of accessions (**Supplementary Figure 2**), indicating presence of  
293 few major haplotypes associated with the LD blocks.

294

295 **GWAS for dry matter content in white root and yellow root subpopulation:** If the  
296 phenotypic association between dry matter and carotenoid contents and the collocation of  
297 their association signals (~ 24.1 Mbp region) is largely caused by physical linkage rather than  
298 by pleiotropy, the major dry matter locus should be detectable in both white root and  
299 yellow root germplasm when analyzed independently. We therefore split the Genetic Gain  
300 dataset into white root (n=210) and yellow root (n=427) subpopulations and repeated the  
301 GWAS analysis. Clones that were at the borderline between yellow-root and white-root  
302 were excluded from these analyses. To mitigate the loss of power as a result of double-  
303 fitting markers in the MLM model both as a fixed effect tested for association and as a  
304 random effect as part of the kinship (Lippert et al., 2011; Listgarten et al., 2012), the MLM  
305 analysis was carried out using a kinship matrix calculated excluding markers from  
306 chromosome 1.

307

308 We recovered the major dry matter content association signal in both the white root and  
309 yellow-root subpopulation (**Figure 8**). Though coinciding with the locus identified in the  
310 population-wide GWAS, the association signal in the white subpopulation was much  
311 broader, extending from 24 to 33 Mbp and generally overlaps with the broad LD region of  
312 the chromosome 1 (**Figure 8**). On the contrary, association signal for the yellow  
313 subpopulation was relatively narrow. Survey of the underlying LD pattern in the same  
314 chromosome region for the yellow subpopulation showed a recombination spot.

315

316 **Selection sweep associated with breeding for yellow-root varieties:** To determine whether  
317 the breeding for carotenoid content trait in the Genetic Gain germplasm resulted in a  
318 selection sweep around the major QTL region, we quantified genome-wide nucleotide  
319 variation in the yellow root subpopulation (n = 210) and the non-yellow subpopulation (n =  
320 427). A sliding-window scan of expected heterozygosity ( $\pi$ ) and Tajima's D detected a ~ 6  
321 Mb region with decrease in nucleotide diversity in the yellow compared to white-root  
322 subpopulation around the first major carotenoid locus site (~ 24.1 Mbp) relative to its  
323 chromosomal neighborhood (**Figure 9**).

324

325 **Proportion of variance explained by markers QTL haplotypes.**

326 To determine predictive ability of the discovered loci for yellow color intensity and dry  
327 matter content, we carried out a multiple linear regression analysis using the *lm* function in  
328 R and considered the top markers for these traits as independent variables and the traits

329 measurements as the response variables. A model considering the two major peaks  
330 associated with gradation of yellow color as assessed using a color chart (S1\_24121306 and  
331 S1\_30543382) returned an adjusted squared correlation ( $R^2$ ) of 0.81. For the measure of  
332 continuous variation in intensity of yellow color using chromameter ( $b^*$  value), the adjusted  
333  $R^2$  from same genomic regions (S1\_24159585 and S1\_30543382) was 0.70 while that for dry  
334 matter content was moderate ( $R^2 = 0.37$ ). This finding suggests that the major loci on  
335 Chromosome 1 would be useful in Marker Assisted Selection breeding in cassava. Single or  
336 joint allelic substitution effects at the associated loci with respect to chromameter  $b^*$  value,  
337 color chart and dry matter content is shown in **Figure 10**.

338

339 **Candidate genes:** The first of the two genomic regions associated color intensity (tagged by  
340 SNP S1\_24159585) was found  $\sim 4.5$  Kbp away from phytoene synthase 2 (*PSY2*) in the  
341 cassava version 6 reference genome. The *PSY2* enzyme, named Manes.01G124200 and  
342 located at 24,155,070 bp, is involved in the first dedicated step of the carotenoid  
343 biosynthesis pathway in cassava roots which converts geranylgeranyl diphosphate to  
344 phytoene (Welsch et al., 2010). Presence of the null versus the functional *PSY2* allele is  
345 responsible for the qualitative color difference between the white and the yellow roots,  
346 respectively (Welsch et al., 2010; Rabbi et al., 2014a). Our study suggests that allelic  
347 variation associated with increases in enzyme activity could contribute to deeper yellow by  
348 increasing the flux into the pathway. No known candidate genes were found in the vicinity  
349 of the second significant association signal on chromosome 1 occurring at 30.5 Mbp.

350

351 For dry matter content, we found two particular genes that are pivotal in central carbon  
352 metabolism in the vicinity of top SNP linked to that trait. The first is UDP-glucose  
353 pyrophosphorylase (named Manes.01G123000 in the cassava reference genome). This gene  
354 which occurs at 24.06 Mbp region, plays a key role in carbohydrate metabolism, and is  
355 strongly associated with the yield production both in grains and root crops (Smith, 2008;  
356 Zeeman et al., 2010). UDP-glucose pyrophosphorylase was recently found to be up-  
357 regulated during bulking of cassava storage roots (Yang et al., 2011; Wang et al., 2016). The  
358 second key carbohydrate metabolism gene was sucrose synthase (named  
359 Manes.01G123800), which occurred in 24.14 Mbp region. Finding of these potential  
360 candidate genes for carotenoid and carbohydrate biosynthesis strongly favors the possibility  
361 that the association between these two traits is caused by physical linkage rather than  
362 pleiotropy. This hypothesis warrants further investigation.

363

## 364 **DISCUSSION AND CONCLUSION**

365 The present study revealed that the genetic architecture for dry matter content and  
366 intensity of yellow color resulting from carotenoid accumulation in cassava roots is  
367 governed by few major loci on chromosome 1 and explains the large repeatability estimates,  
368 particularly for yellow color. These findings expand on those from previous genetic mapping  
369 efforts for dry matter and carotenoid content. Using a candidate gene mapping approach,  
370 Welsch et al. (2010) reported that a SNP mutation in the *PSY2* gene, leading to amino-acid  
371 substitution, differentiates white and yellow cassava storage roots. Similarly, a bi-parental  
372 QTL mapping study that used two clones from the Genetic Gain collection (TMS-I961089A  
373 and TMEB117) also uncovered a single QTL peak whose confidence interval encompassed  
374 the same *PSY2* gene (Rabbi et al., 2014a). The F1 progenies from the TMS-I961089A x  
375 TMEB117 population, also genotyped using the GBS method, segregated at an

376 approximately 1:1 ratio for white versus light-yellow roots, suggesting that the yellow-root  
377 parent was heterozygous for the functional allele at the PSY2 locus. Kizito et al. (2007)  
378 reported a QTL for dry matter content in a bi-parental population genotyped using SSR  
379 markers that also corresponds to this region on chromosome 1. More recently, Esuma et  
380 al., (2016) reported a single genomic region on Chromosome 1 underlies the variation in  
381 total carotenoid content in eight S1 and S2 partially inbred families. This peak, around 24.66  
382 Mbp, is close to our first locus tagged by SNP S1\_24121306. However that study did not look  
383 at genetic architecture for dry matter content.

384

385 While the amount of total carotenoids in the Genetic Gain collection was not directly  
386 estimated, previous studies of diverse cassava germplasm have consistently reported a  
387 strong linear relationship between yellow color and carotenoid content (Pearson's  
388 coefficient,  $r$ , ranging from 0.81 to 0.89) (Iglesias et al., 1997; Chávez et al., 2005; Marín  
389 Colorado et al., 2009; Akinwale et al., 2010; Sánchez et al., 2014). Hence the results  
390 obtained here should be useful for breeding efforts targeting breeding for improved  
391 carotenoid content. Nevertheless, we propose to quantify total carotenoids and its  
392 constituents as a future study to corroborate the current findings.

393

394 Given the importance of dry matter content in cassava, and the fact that we found a single  
395 genomic region associated with this trait, further studies are warranted to fine-map and  
396 validate the identity of the causal locus. To do this effectively would require different  
397 populations that are lacking the wild introgression segments in chromosome 1. This will lead  
398 to reduced LD and allow higher mapping resolution. Additionally, special crosses such as  
399 nested-association mapping population design (Yu et al., 2008) using strategically selected  
400 sets of parents will reduce the confounding effect of population structure. Given our marker  
401 density and sample size, this study is sufficiently powered to find large effect alleles that are  
402 common in the studied germplasm. To detect more QTLs of small effects will require a  
403 larger association panel genotyped at higher density.

404

405 The use of a broad cassava diversity panel in GWAS not only provides the foundation to map  
406 genomic regions associated with natural variation in dry matter and carotenoid content but  
407 also allows us to unravel the genetic cause of the negative correlation between these traits,  
408 that is, pleiotropy versus genetic linkage. In the context of breeding to simultaneously  
409 increase carotenoid and dry matter content, the observed negative association between  
410 these traits in our germplasm is undesirable. Several lines of investigation pointed to a  
411 possibility of genetic linkage rather than pleiotropy to be the cause of the observed  
412 association. Firstly, the genomic region harboring the QTLs for yellow color and dry matter  
413 content was found to occur in chromosomal segments that exhibits low overall  
414 recombination in this region compared to the genome-wide patterns. Recent work by  
415 Bredeson et al. (2016) has shown that this chromosome 1 region harbors a large *M. glaziovii*  
416 introgression that commonly occurs in the Genetic Gain collection. Secondly, independent  
417 association analysis for dry matter content on the white and the yellow subpopulations  
418 detected the same association signal although the QTL in the white subpopulation was  
419 broader suggesting that the favorable alleles were located in non-recombining haplotype.  
420 Thirdly, strong candidate genes for dry matter (UDP-glucose pyrophosphorylase and  
421 sucrose synthase) and carotenoid content (phytoene synthase) were found in the vicinity  
422 of the major association region (24.1 Mbp) of chromosome 1. Presence of these genes hints



423 at possibly distinct biological causes of the observed associations with the two traits. These  
424 hypotheses need to be tested through functional genetics studies at these candidate genes.  
425 Taken together, these findings suggest that the phenotypic correlation between dry matter  
426 and carotenoid content is mainly caused by physical linkage of loci underlying these traits.  
427 Moreover, Ortiz et al. (2011) found a fairly large positive correlation ( $r = 0.62$ ) between  
428 these traits. It is therefore possible that the nature of association (whether positive or  
429 negative) is dependent on the allelic status at the linked dry matter and carotenoid  
430 biosynthesis genes. We also detected a reduction of expected heterozygosity ( $\pi$ ) around the  
431 major gene region in the yellow versus white sub population. This suggests that the genetic  
432 base for sources of favorable alleles with respect to carotenoid biosynthesis at this locus is  
433 narrow, possibly arising from a single haplotype, which could be linked in *cis* to low-dry  
434 matter alleles in the dry matter locus. Alternatively, balancing selection of the *M. glaziovii*  
435 introgression in the white cassava sub population might be the cause of the higher levels of  
436 heterozygosity relative to the yellow sub population.

437

438 Although cassava is a predominantly outcrossing species, its clonally propagated nature  
439 means that modern varieties have undergone relatively few recombination cycles compared  
440 to seed crops. Most accessions in the Genetic Gain collection are not far removed from  
441 founder clones. Accordingly, the extent of LD in this study ( $\sim 2$  Mbp) is much greater than  
442 the LD in maize ( $< 10$  Kb) (Yan et al., 2009) as well as in grape ( $< 10$  Kb) (Myles et al., 2011),  
443 another clonal species. Moreover, the overall recombination pattern is far from  
444 homogeneous owing to the persistent introgressions of *M. glaziovii* chromosomal segments  
445 that are legacies of the historical breeding program in East Africa (Hahn et al., 1980;  
446 Jennings, 1994). From these results, it is expected that the mapping resolution will vary  
447 widely across the cassava genome depending mainly on whether a locus-of-interest occurs  
448 in or outside the large-LD blocks.

449

450 This study presents a significant progress toward dissecting the genetic architecture of two  
451 key breeding goal traits in cassava. The major loci associated with carotenoid content  
452 variation and a single locus associated with dry matter content represents markers that will  
453 be useful for marker-assisted selection in these traits. Although the results of the present  
454 study suggests genetic linkage is more likely to be responsible for the negative correlation  
455 between the studied traits, there is need for further investigations to confirm or reject this  
456 hypothesis. For example, will dry matter content be increased by knocking out the PSY2  
457 gene using gene-silencing methods (Lu et al., 2003; Burch-Smith et al., 2004; Fofana et al.,  
458 2004)? Alternately, could the activation of PSY2 in clones with high dry matter content and  
459 lacking in carotenoids using gene-editing technologies like CRISPR-CAS9 (Hsu et al., 2014;  
460 Sander and Joung, 2014) lead to not only carotenoid production and accumulation but also  
461 lowering of dry matter content?

462

#### 463 **Acknowledgements:**

464 Oluwafemi Alaba and Ruth Uwugiaren for DNA processing; Staff of the Cassava Breeding  
465 Unit of IITA for conducting field trials; Sharon Mitchell, Charlotte Acharya of Cornell's  
466 Genomic Diversity Facility; Lukas Mueller and Guillaume Bauchet for SNP processing and  
467 imputation. This work was supported through HarvestPlus project, The CGIAR Research  
468 Programme on Roots, Tubers, and Bananas (CRP-RTB) and The Next Generation Cassava  
469 Breeding grant OPP1048542 from Bill and Melinda Gates Foundation and the United

470 Kingdom Department for International Development.

471

## 472 **References**

- 473 Akinwale, M.G.. b, R.D.. Aladesanwa, B.O.. Akinyele, A.G.O.. Dixon, and A.C.. Odiyi. 2010.  
474 Inheritance of  $\beta$ -carotene in cassava (*Manihot esculenta crantz*). *Int. J. Genet. Mol.*  
475 *Biol.* 2(10): 198–201.
- 476 Astle, W., and D. Balding. 2009. Population Structure and Cryptic Relatedness in Genetic  
477 Association Studies. *Stat. Sci.* 24(4): 451–471.
- 478 Balagopalan, C. 2002. Cassava: biology, production and utilization (RJ Hillocks and JM  
479 Thresh, Eds.). CABI, Wallingford.
- 480 Balyejusa Kizito, E., A.-C. Rönnerberg-Wästljung, T. Egwang, U. Gullberg, M. Fregene, and A.  
481 Westerbergh. 2007. Quantitative trait loci controlling cyanogenic glucoside and dry  
482 matter content in cassava (*Manihot esculenta Crantz*) roots. *Hereditas* 144(4): 129–  
483 136.
- 484 Bradbury, P.J., Z. Zhang, D.E. Kroon, T.M. Casstevens, Y. Ramdoss, and E.S. Buckler. 2007.  
485 TASSEL: software for association mapping of complex traits in diverse samples.  
486 *Bioinformatics* 23(19): 2633–2635.
- 487 Bredeson, J. V, J.B. Lyons, S.E. Prochnik, G.A. Wu, C.M. Ha, E. Edsinger-Gonzales, J.  
488 Grimwood, J. Schmutz, I.Y. Rabbi, C. Egesi, P. Nauluvula, V. Lebot, J. Ndunguru, G.  
489 Mkamilo, R.S. Bart, T.L. Setter, R.M. Gleadow, P. Kulakow, M.E. Ferguson, S. Rounsley,  
490 and D.S. Rokhsar. 2016. Sequencing wild and cultivated cassava and related species  
491 reveals extensive interspecific hybridization and genetic diversity. *Nat. Biotechnol.*  
492 34(5): 562–570.
- 493 Burch-Smith, T.M., J.C. Anderson, G.B. Martin, and S.P. Dinesh-Kumar. 2004. Applications  
494 and advantages of virus-induced gene silencing for gene function studies in plants.  
495 *Plant J.* 39(5): 734–746.
- 496 Ceballos, H., N. Morante, T. Sánchez, D. Ortiz, I. Aragón, A.L. Chávez, M. Pizarro, F. Calle, and  
497 D. Dufour. 2013. Rapid Cycling Recurrent Selection for Increased Carotenoids Content  
498 in Cassava Roots. *Crop Sci.* 53(6): 2342.
- 499 Chávez, a. L., T. Sánchez, G. Jaramillo, J.M. Bedoya, J. Echeverry, E. a. Bolaños, H. Ceballos,  
500 and C. a. Iglesias. 2005. Variation of quality traits in cassava roots evaluated in  
501 landraces and improved clones. *Euphytica* 143(1–2): 125–133.
- 502 Cock, J.H. 1982. Cassava: a basic energy source in the tropics. *Science* 218(4574): 755–762.
- 503 El-Sharkawy, M.A. 1993. Drought-tolerant cassava for Africa, Asia, and Latin America.  
504 *Bioscience* 43(7): 441–451.
- 505 Elshire, R.J., J.C. Glaubitz, Q. Sun, J. a Poland, K. Kawamoto, E.S. Buckler, and S.E. Mitchell.  
506 2011. A robust, simple genotyping-by-sequencing (GBS) approach for high diversity  
507 species. *PLoS One* 6(5): e19379.
- 508 Esuma, W., L. Herselman, M.T. Labuschagne, P. Ramu, F. Lu, Y. Baguma, E.S. Buckler, and  
509 R.S. Kawuki. 2016. Genome-wide association mapping of provitamin A carotenoid  
510 content in cassava. *Euphytica*.
- 511 Esuma, W., P. Rubaihayo, A. Pariyo, R. Kawuki, B. Wanjala, I. Nzuki, J.J. Harvey, and Y.  
512 Baguma. 2012. Genetic Diversity of Provitamin A Cassava in Uganda. *J. Plant Stud.* 1(1):  
513 60–71.
- 514 Fofana, I.B.F., A. Sangaré, R. Collier, C. Taylor, and C.M. Fauquet. 2004. A geminivirus-  
515 induced gene silencing system for gene function validation in cassava. *Plant Mol. Biol.*  
516 56(4): 613–24.

- 517 Glaubitz, J.C., T.M. Casstevens, F. Lu, J. Harriman, R.J. Elshire, Q. Sun, and E.S. Buckler. 2014.  
518 TASSEL-GBS: A high capacity genotyping by sequencing analysis pipeline. *PLoS One* 9(2).  
519 Hahn, S.K., E.R. Terry, and K. Leuschner. 1980. Breeding cassava for resistance to cassava  
520 mosaic disease. *Euphytica* 29(3): 673–683.
- 521 Hamblin, M.T., E.S. Buckler, and J.-L. Jannink. 2011. Population genetics of genomics-based  
522 crop improvement methods. *Trends Genet.* 27(3): 98–106.
- 523 Harjes, C.E., T.R. Rocheford, L. Bai, T.P. Brutnell, C.B. Kandianis, S.G. Sowinski, A.E. Stapleton,  
524 R. Vallabhaneni, M. Williams, E.T. Wurtzel, J. Yan, and E.S. Buckler. 2008. Natural  
525 genetic variation in lycopene epsilon cyclase tapped for maize biofortification. *Science*  
526 319: 330–333.
- 527 Hsu, P.D., E.S. Lander, and F. Zhang. 2014. Development and applications of CRISPR-Cas9 for  
528 genome engineering. *Cell* 157(6): 1262–1278.
- 529 Iglesias, C., J. Mayer, L. Chavez, and F. Calle. 1997. Genetic potential and stability of  
530 carotene content in cassava roots. *Euphytica* 94(3): 367–373.
- 531 International Cassava Genetic Map Consortium (ICGMC). 2014. High-resolution linkage map  
532 and chromosome-scale genome assembly for cassava (*Manihot esculenta* Crantz) from  
533 10 populations. *G3 (Bethesda)*. 5(1): 133–44.
- 534 Jennings, D.L. 1994. Breeding for resistance to African cassava mosaic geminivirus in East  
535 Africa. *Trop. Sci.* 34(1): 110–122.
- 536 Langmead, B., and S.L. Salzberg. 2012. Fast gapped-read alignment with Bowtie 2. *Nat*  
537 *Methods* 9(4): 357–359.
- 538 Lippert, C., J. Listgarten, Y. Liu, C.M. Kadie, R.I. Davidson, and D. Heckerman. 2011. FaST  
539 linear mixed models for genome-wide association studies. *Nat. Methods* 8(10): 833–  
540 837.
- 541 Listgarten, J., C. Lippert, C.M. Kadie, R.I. Davidson, E. Eskin, and D. Heckerman. 2012.  
542 Improved linear mixed models for genome-wide association studies. *Nat. Methods*  
543 9(6): 525–526.
- 544 Lu, R., A.M. Martin-Hernandez, J.R. Peart, I. Malcuit, and D.C. Baulcombe. 2003. Virus-  
545 induced gene silencing in plants. *Methods* 30(4): 296–303.
- 546 Ly, D., M. Hamblin, I. Rabbi, G. Melaku, M. Bakare, H.G. Gauch, R. Okechukwu, A.G.O. Dixon,  
547 P. Kulakow, and J.-L. Jannink. 2013. Relatedness and Genotype × Environment  
548 Interaction Affect Prediction Accuracies in Genomic Selection: A Study in Cassava. *Crop*  
549 *Sci.* 53(4): 1312–1325.
- 550 Marín Colorado, J.A., H. Ramírez, and M. Fregene. 2009. Genetic mapping and QTL analysis  
551 for carotenes in a S1 population of cassava. *Acta Agron. Univ. Nac. Colomb.* 58(1): 15–  
552 21.
- 553 Morillo C, A.C., Y. Morillo C, and H. Ceballos L. 2013. Identification of QTLs for carotene  
554 content in the genome of cassava (*Manihot esculenta* Crantz) and S1 population  
555 validation. *Acta Agronómica, Univ. Nac. Colomb.* 62(3): 196–206.
- 556 Myles, S., A.R. Boyko, C.L. Owens, P.J. Brown, F. Grassi, M.K. Aradhya, B. Prins, A. Reynolds,  
557 J.-M. Chia, D. Ware, C.D. Bustamante, and E.S. Buckler. 2011. Genetic structure and  
558 domestication history of the grape. *Proc. Natl. Acad. Sci. U. S. A.* 108(9): 3530–3535.
- 559 Njoku, D.N., V.E. Gracen, S.K. Offei, I.K. Asante, E.Y. Danquah, C.N. Egesi, and E. Okogbenin.  
560 2014. Molecular marker analysis of F1 progenies and their parents for carotenoids i  
561 nheritance in African cassava (*Manihot esculenta* Crantz). *African J. Biotechnol.* 13(40):  
562 3999–4007.
- 563 Njoku, D.N., V.E. Gracen, S.K. Offei, I.K. Asante, C.N. Egesi, P. Kulakow, and H. Ceballos.

- 564 2015. Parent-offspring regression analysis for total carotenoids and some agronomic  
565 traits in cassava. *Euphytica* 206(3): 657–666.
- 566 Okechukwu, R.U., and a. G.O. Dixon. 2008. Genetic Gains from 30 Years of Cassava Breeding  
567 in Nigeria for Storage Root Yield and Disease Resistance in Elite Cassava Genotypes. *J.*  
568 *Crop Improv.* 22(2): 181–208.
- 569 Ortiz, D., T. Sánchez, N. Morante, H. Ceballos, H. Pachón, M.C. Duque, A.L. Chávez, and A.F.  
570 Escobar. 2011. Sampling strategies for proper quantification of carotenoid content in  
571 cassava breeding. *J. Plant Breed. Crop Sci.* 3(1): 14–23.
- 572 Owens, B.F., A.E. Lipka, M. Magallanes-Lundback, T. Tiede, C.H. Diepenbrock, C.B. Kandianis,  
573 E. Kim, J. Cepela, M. Mateos-Hernandez, C.R. Buell, E.S. Buckler, D. DellaPenna, M. a  
574 Gore, and T. Rocheford. 2014. A Foundation for Provitamin A Biofortification of Maize:  
575 Genome-Wide Association and Genomic Prediction Models of Carotenoid Levels.  
576 *Genetics* 198(4): 1699–1716.
- 577 Pfeiffer, W.H., and B. McClafferty. 2007. HarvestPlus: Breeding Crops for Better Nutrition.  
578 *Crop Sci.* 47(Supplement\_3): S-88.
- 579 Prochnik, S., P.R. Marri, B. Desany, P.D. Rabinowicz, C. Kodira, M. Mohiuddin, F. Rodriguez,  
580 C. Fauquet, J. Tohme, T. Harkins, D.S. Rokhsar, and S. Rounsley. 2012. The Cassava  
581 Genome: Current Progress, Future Directions. *Trop. Plant Biol.* 5(1): 88–94.
- 582 Purcell, S., B. Neale, K. Todd-Brown, L. Thomas, M. a R. Ferreira, D. Bender, J. Maller, P.  
583 Sklar, P.I.W. de Bakker, M.J. Daly, and P.C. Sham. 2007. PLINK: a tool set for whole-  
584 genome association and population-based linkage analyses. *Am. J. Hum. Genet.*  
585 81(September): 559–575.
- 586 Rabbi, I., M. Hamblin, M. Gedil, P. Kulakow, M. Ferguson, A.S. Ikpan, D. Ly, and J.L. Jannink.  
587 2014a. Genetic mapping using genotyping-by-sequencing in the clonally propagated  
588 cassava. *Crop Sci.* 54(4): 1384–1396.
- 589 Rabbi, I.Y., M.T. Hamblin, P.L. Kumar, M. a Gedil, A.S. Ikpan, J.-L. Jannink, and P. a Kulakow.  
590 2014b. High-resolution mapping of resistance to cassava mosaic geminiviruses in  
591 cassava using genotyping-by-sequencing and its implications for breeding. *Virus Res.*  
592 186: 87–96.
- 593 Saltzman, A., E. Birol, H.E. Bouis, E. Boy, F.F. De Moura, Y. Islam, and W.H. Pfeiffer. 2013.  
594 Biofortification : Progress toward a more nourishing future. *Glob. Food Sec.* 2(1): 9–17.
- 595 Sánchez, T., H. Ceballos, D. Dufour, D. Ortiz, N. Morante, F. Calle, T. Zum Felde, M.  
596 Domínguez, and F. Davrieux. 2014. Prediction of carotenoids, cyanide and dry matter  
597 contents in fresh cassava root using NIRS and Hunter color techniques. *Food Chem.*  
598 151: 444–451.
- 599 Sander, J.D., and J.K. Joung. 2014. CRISPR-Cas systems for editing, regulating and targeting  
600 genomes. *Nat. Biotechnol.* 32(4): 347–55.
- 601 Sayre, R., J.R. Beeching, E.B. Cahoon, C. Egesi, C. Fauquet, J. Fellman, M. Fregene, W.  
602 Gruissem, S. Mallowa, M. Manary, B. Maziya-Dixon, A. Mbanaso, D.P. Schachtman, D.  
603 Siritunga, N. Taylor, H. Vanderschuren, and P. Zhang. 2011. The BioCassava plus  
604 program: biofortification of cassava for sub-Saharan Africa. *Annu. Rev. Plant Biol.* 62:  
605 251–72.
- 606 Smith, A.M. 2008. Prospects for increasing starch and sucrose yields for bioethanol  
607 production. *Plant J.* 54(4): 546–558.
- 608 Suwarno, W.B., K. V Pixley, N. Palacios-Rojas, S.M. Kaeppeler, and R. Babu. 2015. Genome-  
609 wide association analysis reveals new targets for carotenoid biofortification in maize.  
610 *Theor. Appl. Genet.* 128(5): 851–864.

- 611 Wang, X., L. Chang, Z. Tong, D. Wang, Q. Yin, D. Wang, X. Jin, Q. Yang, L. Wang, Y. Sun, Q.  
612 Huang, A. Guo, and M. Peng. 2016. Proteomics Profiling Reveals Carbohydrate  
613 Metabolic Enzymes and 14-3-3 Proteins Play Important Roles for Starch Accumulation  
614 during Cassava Root Tuberization. *Sci. Rep.* 6(January): 19643.
- 615 Welsch, R., J. Arango, C. Bär, B. Salazar, S. Al-Babili, J. Beltrán, P. Chavarriaga, H. Ceballos, J.  
616 Tohme, and P. Beyer. 2010. Provitamin A accumulation in cassava (*Manihot esculenta*)  
617 roots driven by a single nucleotide polymorphism in a phytoene synthase gene. *Plant*  
618 *Cell* 22(10): 3348–56.
- 619 Wolfe, M.D., I.Y. Rabbi, C. Egesi, M. Hamblin, R. Kawuki, P. Kulakow, R. Lozano, D.P. Del  
620 Carpio, P. Ramu, and J.-L. Jannink. 2016. Genome-Wide Association and Prediction  
621 Reveals Genetic Architecture of Cassava Mosaic Disease Resistance and Prospects for  
622 Rapid Genetic Improvement. *Plant Genome* 9(2): 1–248.
- 623 Wong, W.W.L., J. Griesman, and Z.Z. Feng. 2014. Imputing genotypes using regularized  
624 generalized linear regression models. *Stat. Appl. Genet. Mol. Biol.* 13(5).
- 625 Yan, J., T. Shah, M.L. Warburton, E.S. Buckler, M.D. McMullen, and J. Crouch. 2009. Genetic  
626 characterization and linkage disequilibrium estimation of a global maize collection  
627 using SNP markers. *PLoS One* 4(12): e8451.
- 628 Yang, J., D. An, and P. Zhang. 2011. Expression Profiling of Cassava Storage Roots Reveals an  
629 Active Process of Glycolysis/Gluconeogenesis. *J. Integr. Plant Biol.* 53(3): 193–211.
- 630 Yu, J., J.B. Holland, M.D. McMullen, and E.S. Buckler. 2008. Genetic Design and Statistical  
631 Power of Nested Association Mapping in Maize. 551(January): 539–551.
- 632 Yu, J., G. Pressoir, W.H. Briggs, I. Vroh Bi, M. Yamasaki, J.F. Doebley, M.D. McMullen, B.S.  
633 Gaut, D.M. Nielsen, J.B. Holland, S. Kresovich, and E.S. Buckler. 2006. A unified mixed-  
634 model method for association mapping that accounts for multiple levels of relatedness.  
635 *Nat. Genet.* 38(2): 203–208.
- 636 Zeeman, S.C., J. Kossmann, and A.M. Smith. 2010. Starch: its metabolism, evolution, and  
637 biotechnological modification in plants. *Annu. Rev. Plant Biol.* 61: 209–234.
- 638 Zhang, Z., E. Ersoz, C.-Q. Lai, R.J. Todhunter, H.K. Tiwari, M. a Gore, P.J. Bradbury, J. Yu, D.K.  
639 Arnett, J.M. Ordovas, and E.S. Buckler. 2010. Mixed linear model approach adapted for  
640 genome-wide association studies. *Nat. Genet.* 42(4): 355–60.
- 641 Zhao, K., C.-W. Tung, G.C. Eizenga, M.H. Wright, M.L. Ali, A.H. Price, G.J. Norton, M.R. Islam,  
642 A. Reynolds, J. Mezey, A.M. McClung, C.D. Bustamante, and S.R. McCouch. 2011.  
643 Genome-wide association mapping reveals a rich genetic architecture of complex traits  
644 in *Oryza sativa*. *Nat. Commun.* 2: 467.
- 645  
646



647 **Tables**

648

649 **Table 1.** Summary of phenotype variation, variance components ( $\pm$ se) and broad-sense  
650 heritability ( $H^2$ ) for dry matter, color chart and Chromameter CIELAB readings.

| Trait            | DM (%)       | TC-CHART    | L*          | a*          | b*           |
|------------------|--------------|-------------|-------------|-------------|--------------|
| Minimum          | 8.4          | 1.0         | 69.5        | -3.0        | 11.1         |
| Average          | 28.6         | 1.7         | 84.4        | -0.3        | 20.8         |
| Maximum          | 45.4         | 7.0         | 90.2        | 4.6         | 40.8         |
| N                | 3232         | 4237        | 1360        | 1360        | 1360         |
| $V_G$            | 16.52 (4.06) | 1.11 (1.05) | 5.22 (2.29) | 0.86 (0.92) | 16.52 (4.06) |
| $V_{G \times E}$ | 3.53 (1.88)  | 0.06 (0.24) | 0.77 (0.88) | 0.16 (0.41) | 2.87 (1.69)  |
| $V_E$            | 1.91 (1.38)  | 0.01 (0.11) | 0.53 (0.73) | 0.08 (0.28) | 1.11 (1.05)  |
| Residual         | 10.27 (3.20) | 0.17 (0.41) | 3.26 (1.80) | 0.30 (0.55) | 2.71 (1.65)  |
| $H^2$            | 0.51         | 0.82        | 0.53        | 0.61        | 0.87         |

651

652

653 **Table 2.** Summary of significant associations between selected traits and SNP markers from  
654 the MLM analysis. Only results in the major loci from Chromosome 1 are shown.

| Trait             | SNP             | Chr | Position (bp) | P-value  | Candidate genes and mid-position (bp)                                                                                      |
|-------------------|-----------------|-----|---------------|----------|----------------------------------------------------------------------------------------------------------------------------|
| Color chart       | S1_2412130<br>6 | 1   | 24,121,306    | 1.74E-22 | Phytoene synthase (Manes.01G124200;<br>24,155,070 bp)                                                                      |
| Color chart       | S1_3054338<br>2 | 1   | 30,543,382    | 2.91E-11 | NA                                                                                                                         |
| Chromameter<br>b* | S1_2415958<br>5 | 1   | 24,159,585    | 1.79E-19 | Phytoene synthase (Manes.01G124200;<br>24,155,070 bp)                                                                      |
| Chromameter<br>b* | S1_3054338<br>2 | 1   | 30,543,382    | 1.66E-11 | NA                                                                                                                         |
| Dry matter        | S1_2412130<br>6 | 1   | 24,121,306    | 1.86E-12 | UDP-glucose pyrophosphorylase<br>(Manes.01G123000; 24,061,652 bp);<br>sucrose synthase (Manes.01G123800;<br>24,142,314 bp) |

655 Chr = Chromosome (version 6 of cassava reference genome);

656

657

658 **Figures**

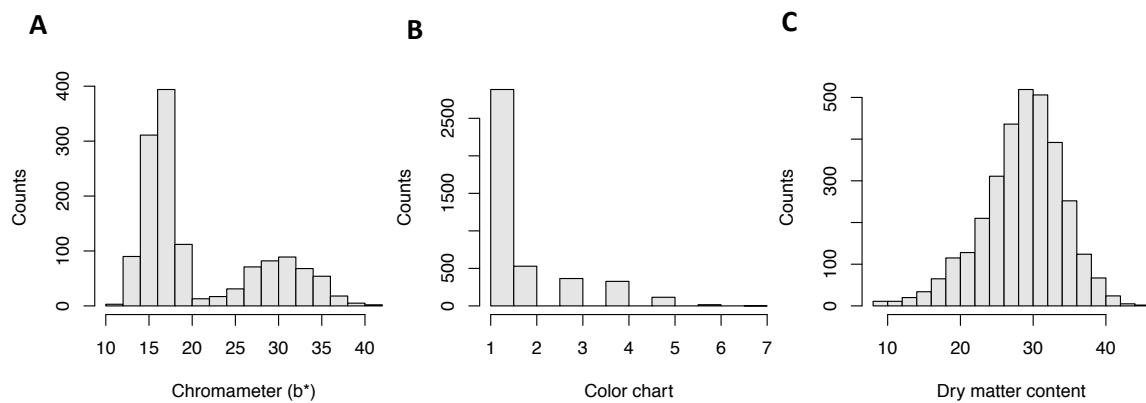

659 **Figure 1.** Distribution of phenotype for TCHART, Dry matter content, and chromameter (b\*).

660  
661  
662  
663

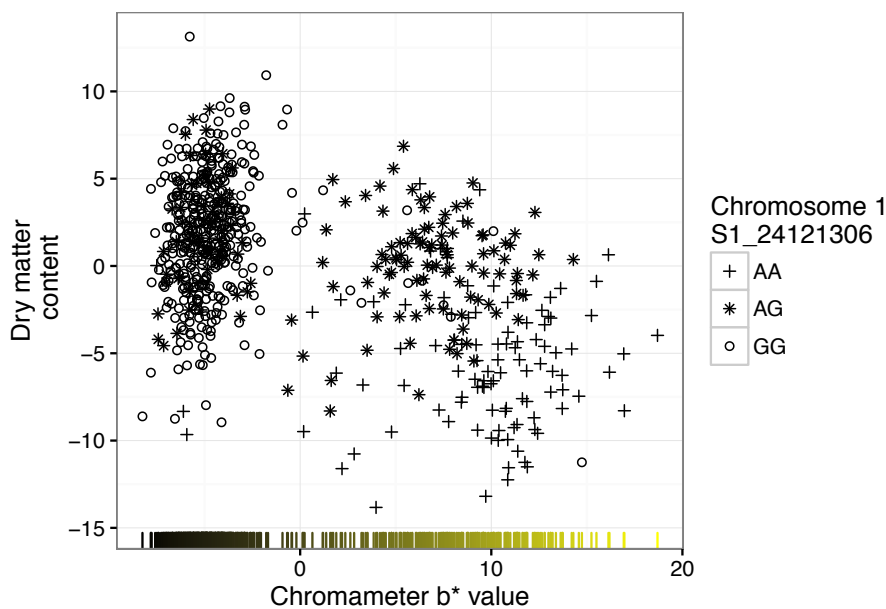

664 **Figure 2.** Relationship between dry matter content and root yellowness BLUPs (expressed as  
665 b\* value of chromameter measurement). Different symbols denote the genotype at marker  
666 S1\_24121306 that is associated with both dry matter content and root color intensity.  
667

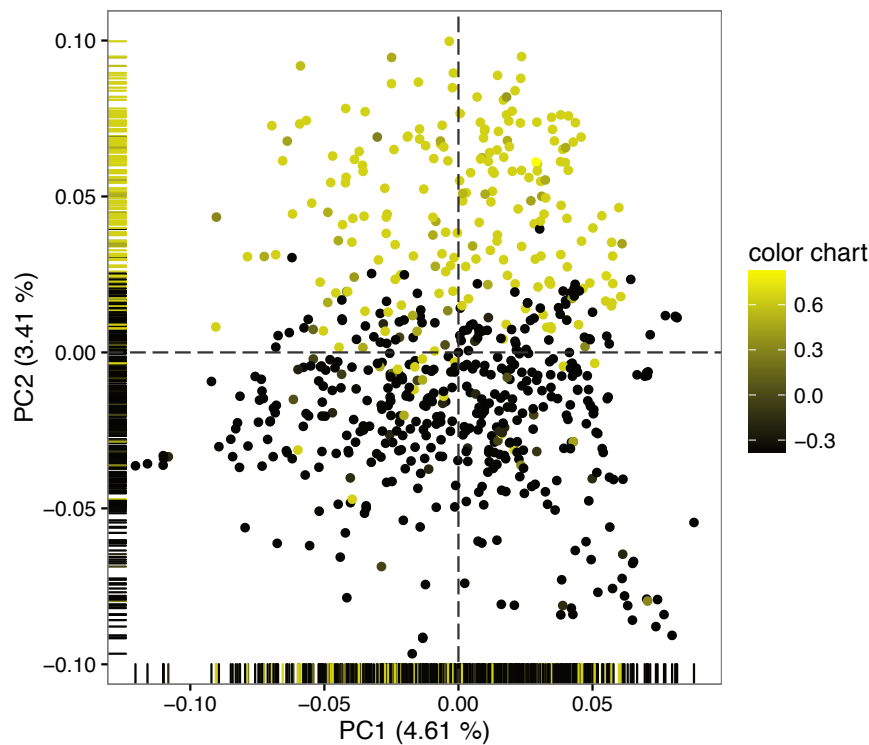

668  
669  
670  
671  
672  
673

**Figure 3.** Population structure of the Genetic Gain collection. (A) PCA bi-plot of the first two axes; (B) Neighbor-joining dendrogram calculated from pairwise IBS distance. Yellow color highlights accessions with yellow roots.

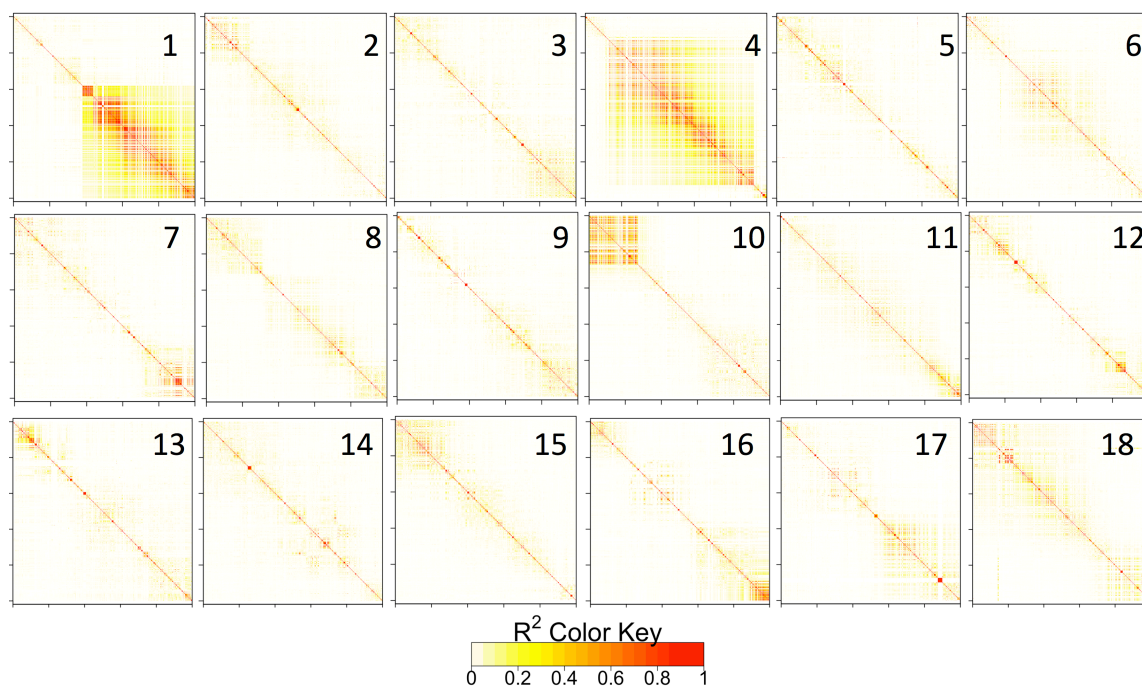

674  
675  
676  
677

**Figure 4.** Local pattern of linkage disequilibrium ( $r^2$ ) along each of the 18 cassava chromosomes. Note the large LD blocks in chromosomes 1, 4 and 10. SNPs are arrayed according to their order, and not their physical position.

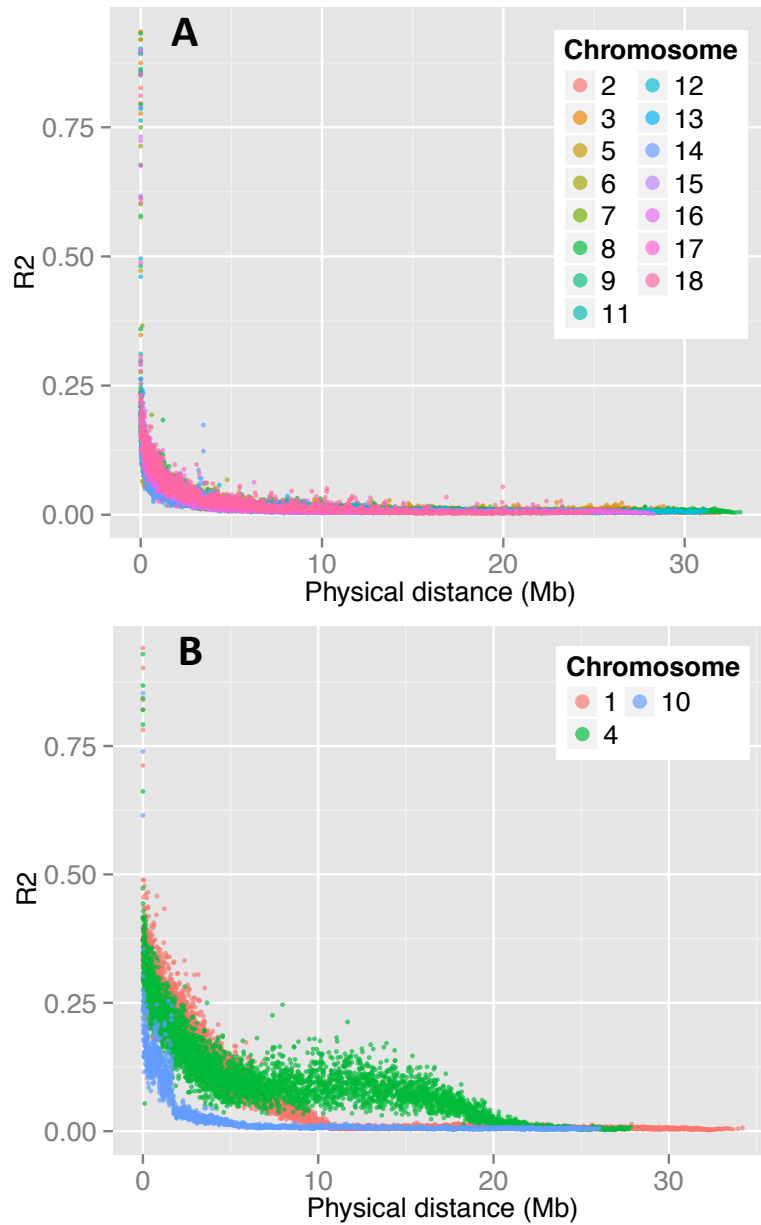

678

679

680

681

**Figure 5.** A Moving-average based LD decay profile in the Genetic Gain population. (A) all chromosomes except 1, 4 and 10; (B) chromosomes 1, 4 and 10.

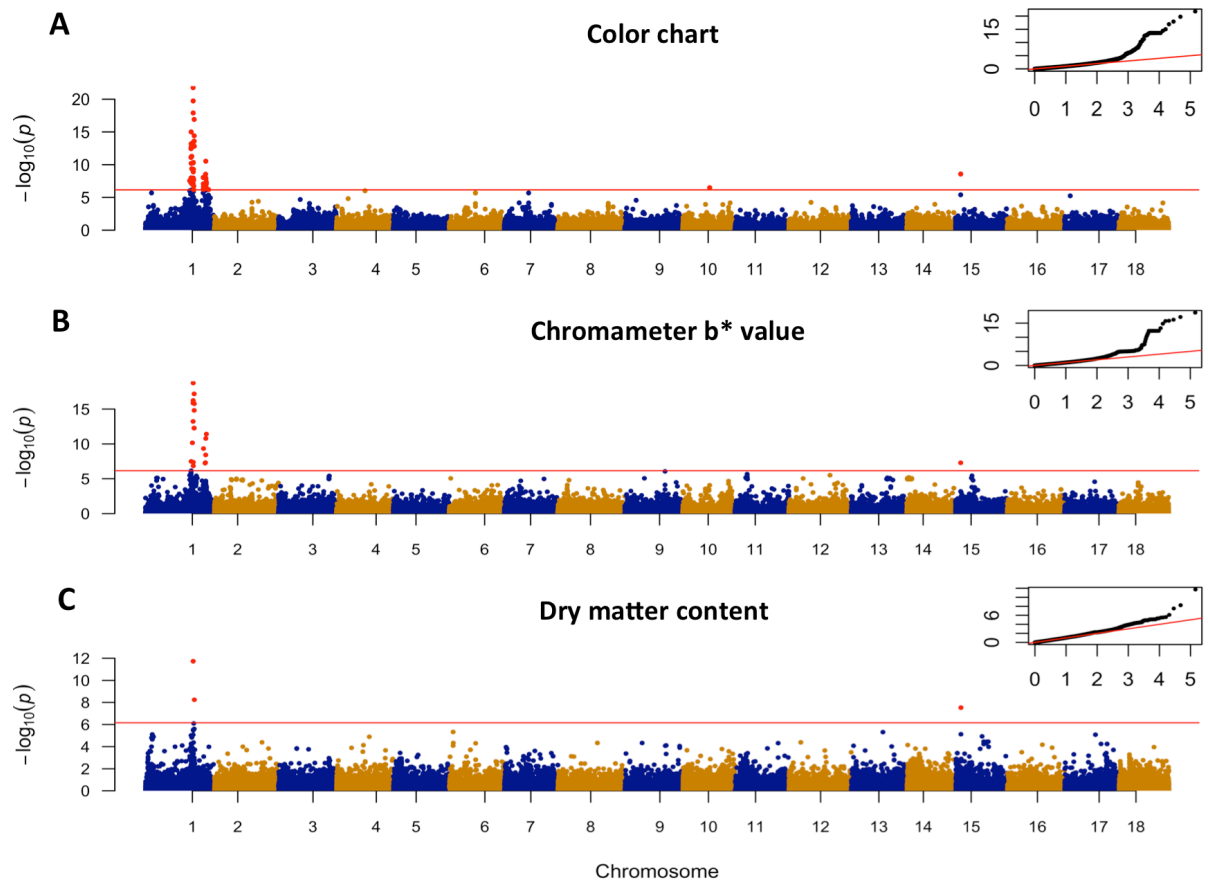

682  
683  
684  
685  
686  
687

**Figure 6.** Genome-wide association results. Manhattan and Quantile-quantile plot of the MLM model for: root yellowness estimated using (A) chromameter b\* value; and (B) color chart method; and (C) dry matter content. The red horizontal line indicates the genome-wide significance threshold.



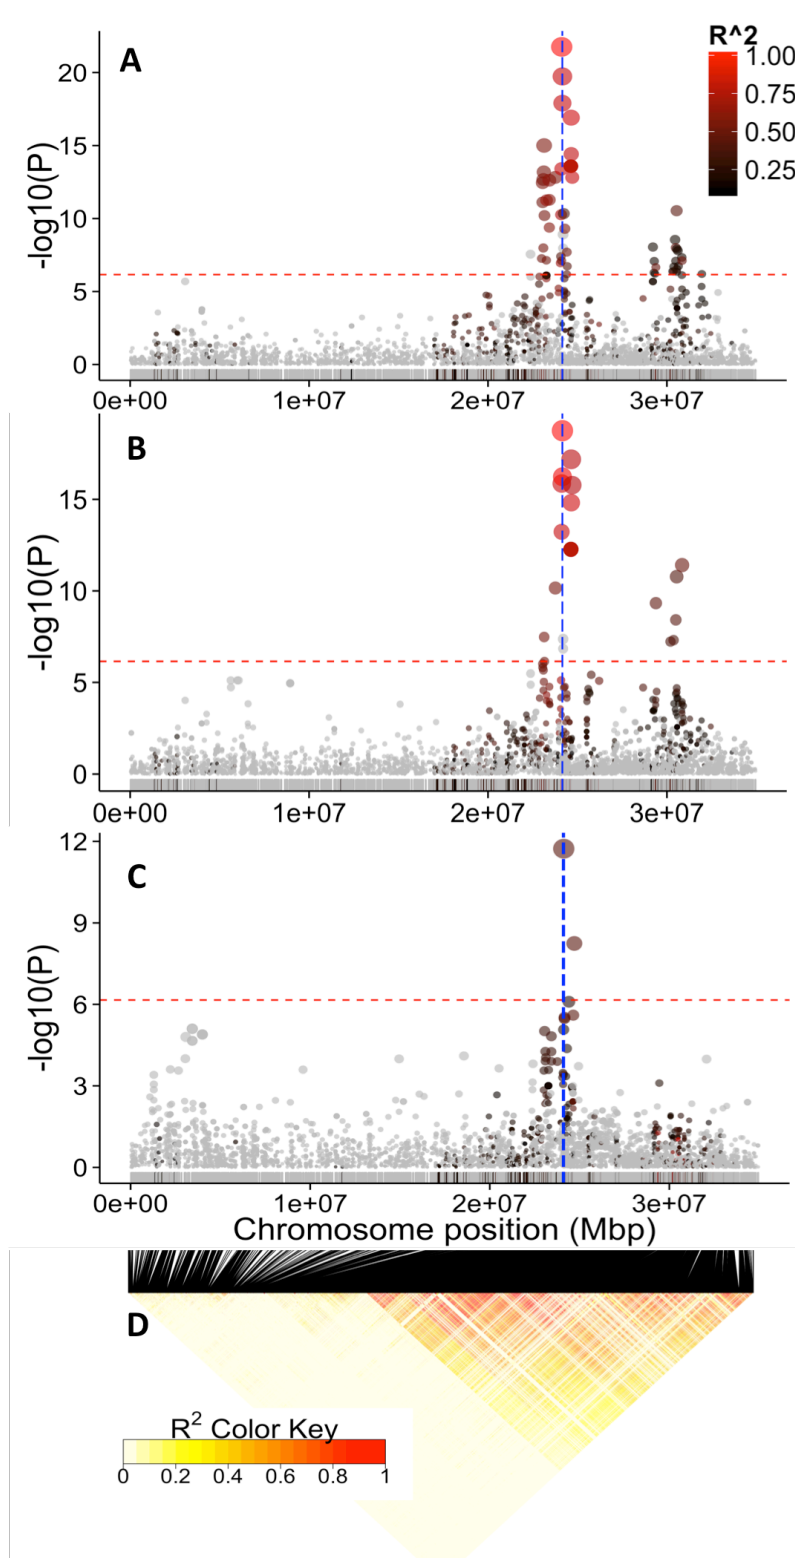

688  
689 **Figure 7.** GWAS results for chromosome 1. Manhattan and Quantile-quantile plot of the  
690 MLM model for: (A) root yellowness as measured by chromameter  $b^*$  value; (B) color chart;  
691 and (C) dry matter content. Note the common peak at  $\sim 24.1$  Mbp region for the three  
692 traits. Red horizontal line indicates the genome-wide significance threshold. The SNPs are  
693 colored according to their degree of linkage disequilibrium ( $r^2$ ) with the leading variant (i.e.  
694 top SNP for the first peak at 24.1 Mbp). The vertical blue lines in (A) and (B) denote the  
695 position of the carotenoid biosynthesis gene, phytoene synthase (24,155,070 bp), and those

696 on (C) denotes the positions of the UDP-glucose pyrophosphorylase (24,061,652 bp) and  
697 sucrose synthase (24,142,314 bp).

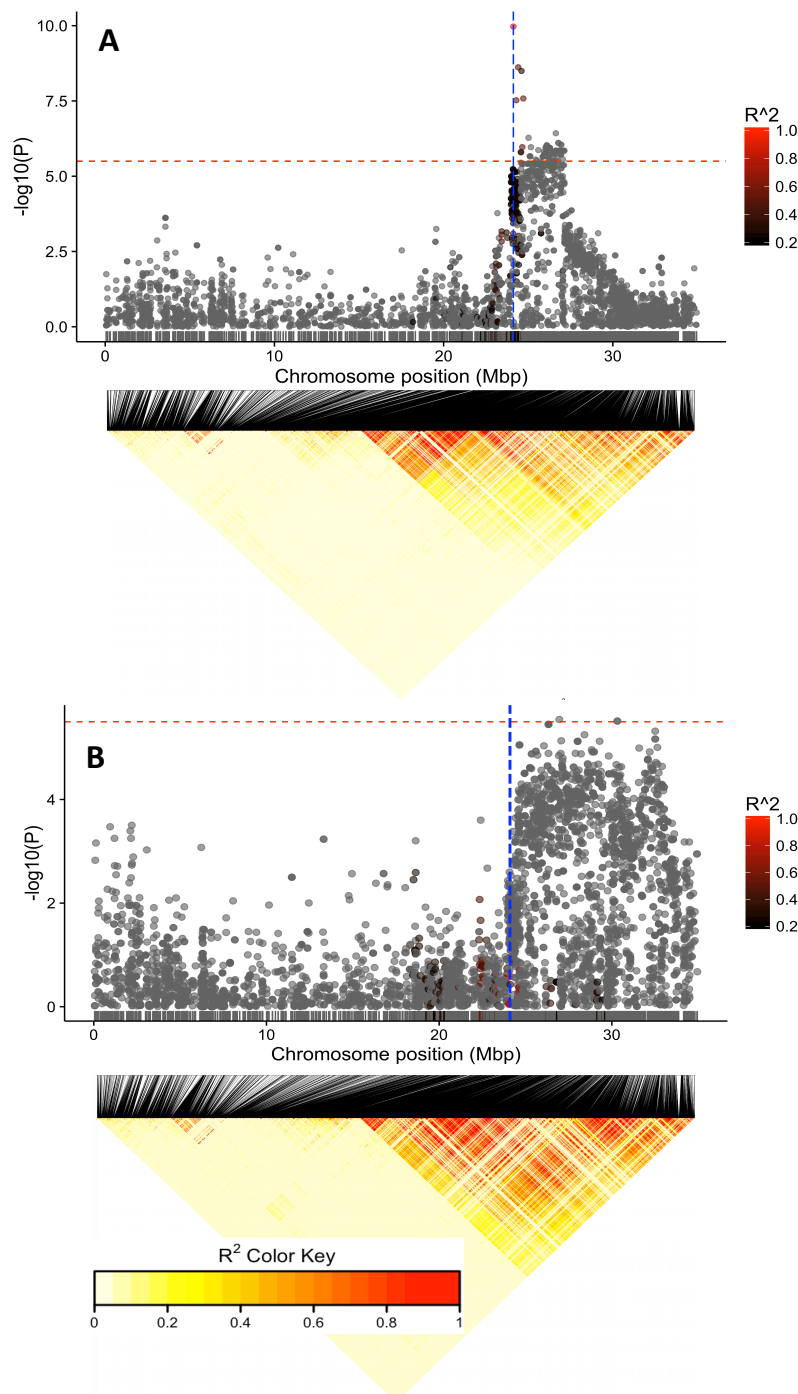

698 **Figure 8.** Manhattan plots of the MLM analysis of the yellow root (top) and white root  
699 subpopulations (bottom). Below each is an LD heatmap showing pairwise squared  
700 correlation of alleles between markers along chromosome 1. Note the large number of SNPs  
701 showing significant association with dry matter in the white subpopulation compared to  
702 that of the yellow subpopulation. Red horizontal line indicates the genome-wide  
703 significance threshold. The vertical blue lines are same as in Figure 7.  
704  
705

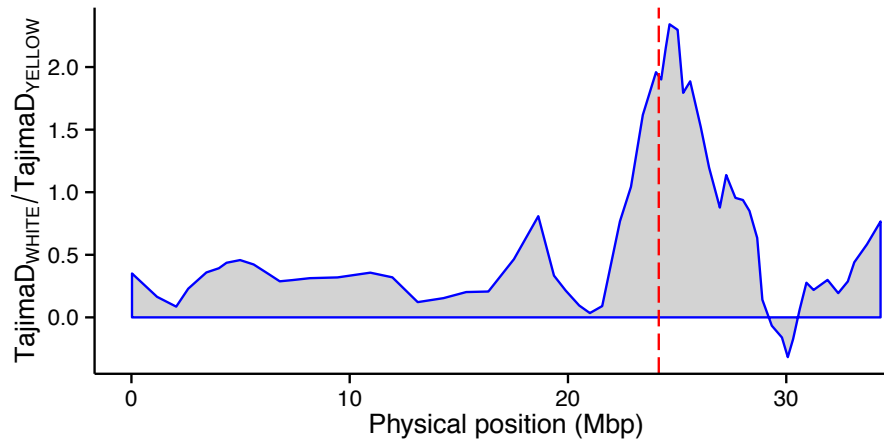

706  
707  
708  
709

**Figure 9.** Selection sweep associated with positive selection for provitamin A trait varieties in the genetic gain population. Red dashed line indicates the position of SNP S1\_24121306.

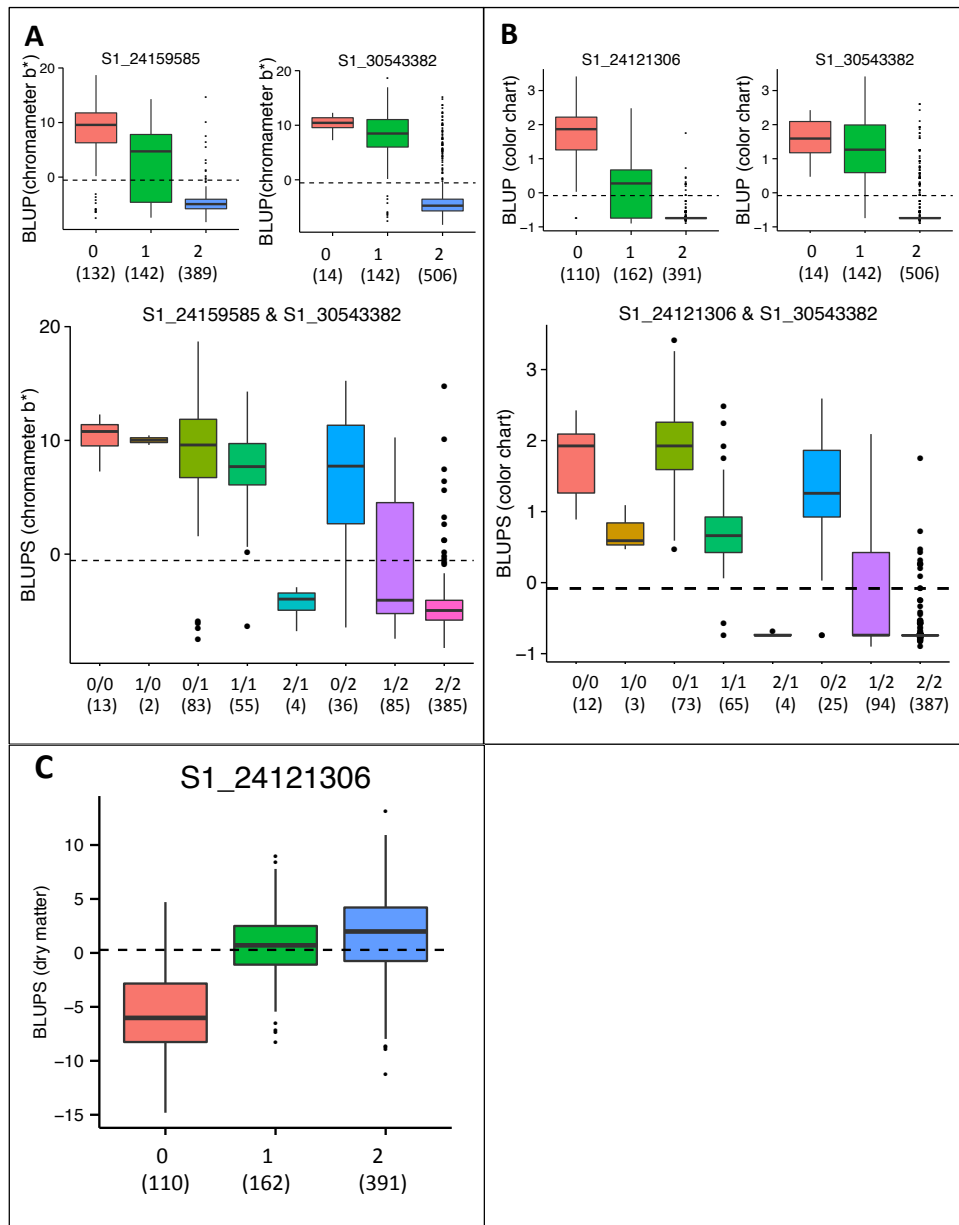

710

711 **Figure 10.** Effect of the most significantly associated markers on the BLUPs for yellow color  
712 measured by: (A) Chromameter ( $b^*$  value) and (B) color chart in the Genetic Gain  
713 population. The boxplots show the effects of the most significantly associated SNPs at first  
714 and second peaks (above) and the two-locus haplotypes (below) on chromosomes 1. (C)  
715 Effect of the most significantly associated markers on the BLUPs for dry matter content.  
716 Alleles are coded as 0 = homozygous reference genome; 1 = heterozygous and 2 =  
717 homozygous non-reference genome. The dashed line represents the population mean of the  
718 BLUPs. The numbers in parenthesis below genotypic categories refer to the number of  
719 accessions for each genotype.  
720  
721

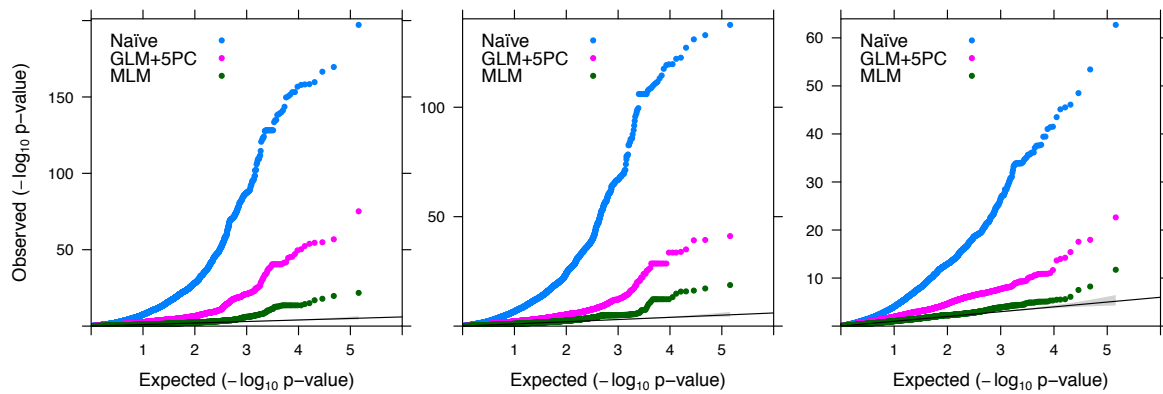

722  
723  
724  
725  
726

**Supplementary Figure 1.** Quantile–quantile plots for P-values obtained from simple GLM,  
GLM+5PCs and MLM model for color chart, chromameter  $b^*$  value and dry matter content.

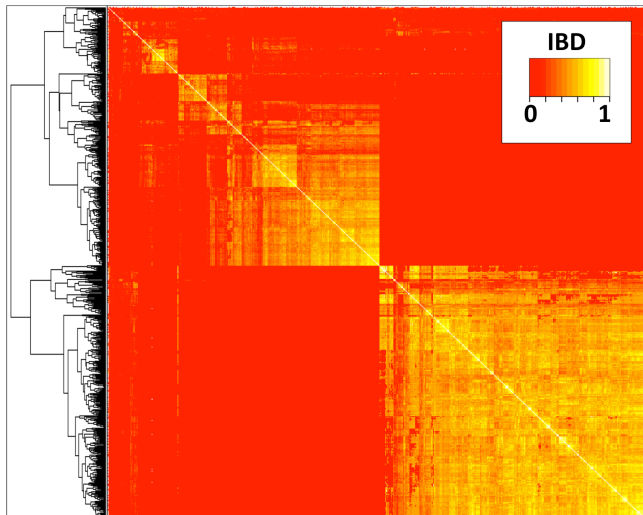

727  
728 **Supplementary Figure 2.** Heatmap of identity-by-descent relationship using SNPs from large  
729 LD block in chromosome 1 around the major QTL region.  
730
